# Supplementary material for: Understanding the superior thermoelectric performance of Sb precipitated Ge17Sb2Te20
Source: Royal Society of Chemistry journal article supplement (doi:10.1039/c6tc03789e), 2016-01-01
Supplement: c6tc03789e1.pdf [file c6tc03789e1.pdf]

## Supporting Information

### Understanding the Superior Thermoelectric Performance of Sb Precipitated $\text{Ge}_{17}\text{Sb}_2\text{Te}_{20}$

Jared B. Williams, Donald T. Morelli

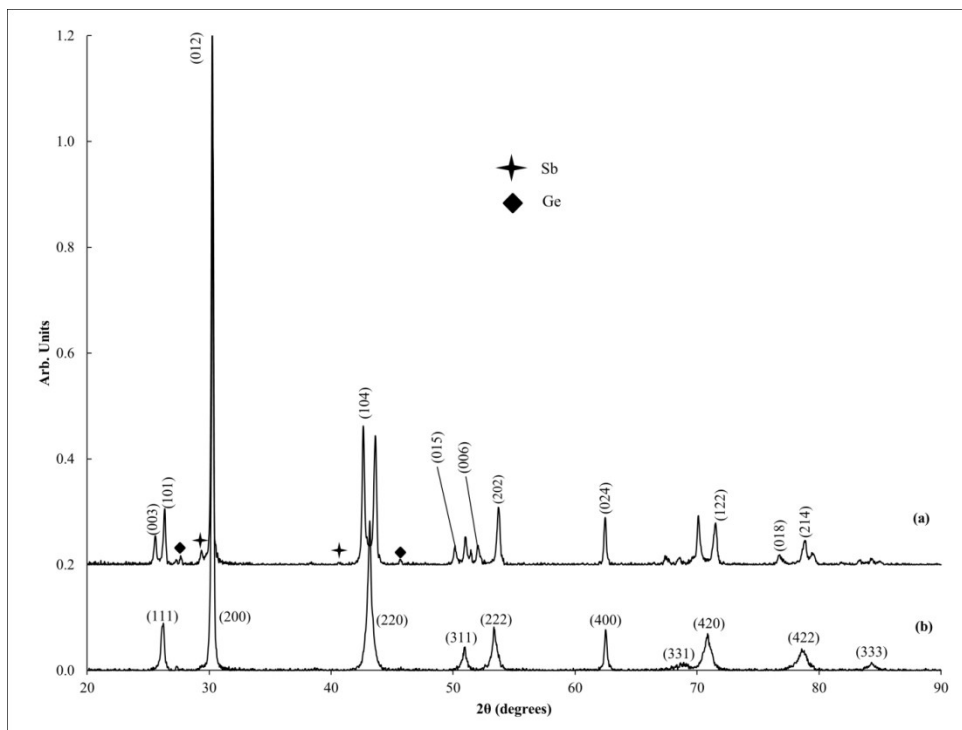

**Figure S1** X-ray diffraction pattern of (a), rhombohedral ( $R-3m$ )  $\text{Ge}_{17}\text{Sb}_2\text{Te}_{20}$  quenched from the melt at  $900^\circ\text{C}$ , and (b), rocksalt ( $Fm-3m$ )  $\text{Ge}_{17}\text{Sb}_2\text{Te}_{20}$  quenched and subsequently annealed at  $590^\circ\text{C}$  for 24 hours. Secondary phases of elemental Sb and Ge were identified in the pattern of quenched  $\text{Ge}_{17}\text{Sb}_2\text{Te}_{20}$ .

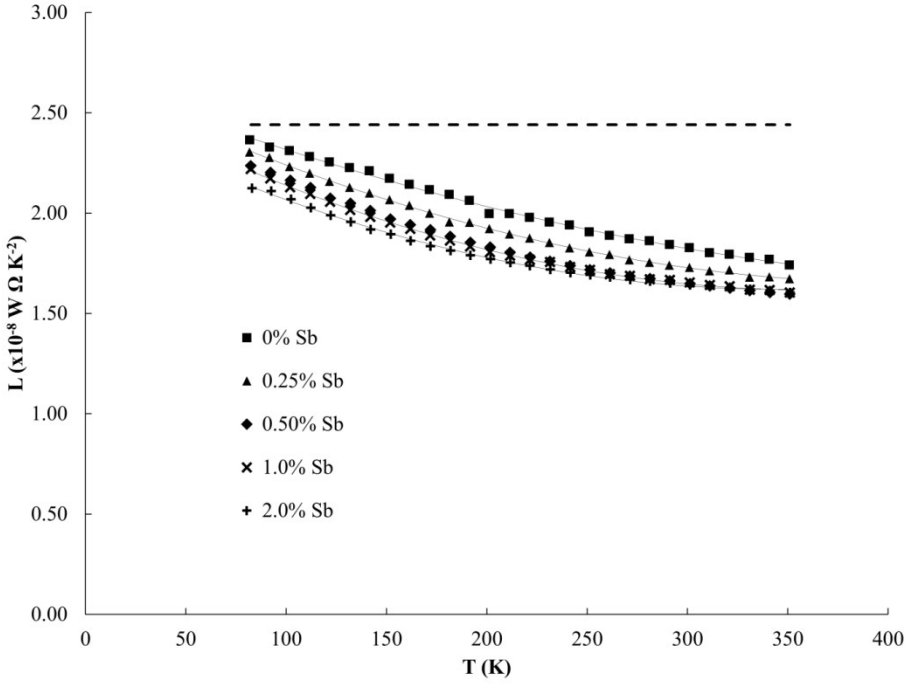

**Figure S2** Calculated Lorenz number versus temperature for  $\text{Ge}_{17}\text{Sb}_2\text{Te}_{20}$  and for 0.25%, 0.50%, 1.0%, and 2.0% Sb added to  $\text{Ge}_{17}\text{Sb}_2\text{Te}_{20}$ . This calculation, based on the single parabolic band model, shows a large deviation from the free electron value of  $2.44 \times 10^{-8} \text{ W}\Omega\text{K}^{-2}$ .

| <b>Table S1</b>                                                                                           |                         |                                    |                                          |                                                     |
|-----------------------------------------------------------------------------------------------------------|-------------------------|------------------------------------|------------------------------------------|-----------------------------------------------------|
| Electrical resistivity, Seebeck coefficient, carrier concentration, and hole mobility at room temperature |                         |                                    |                                          |                                                     |
| $\text{Ge}_{17}\text{Sb}_2\text{Te}_{20}+\text{Sb}_x$                                                     | $\rho$ (m $\Omega$ -cm) | $S$ ( $\mu\text{V}\text{K}^{-1}$ ) | $p$ ( $\times 10^{20} \text{ cm}^{-3}$ ) | $\mu_h$ ( $\text{cm}^2\text{V}^{-1}\text{s}^{-1}$ ) |
| $x=0$                                                                                                     | 1.68                    | 120                                | 0.575                                    | 87.8                                                |
| $x=0.0975$                                                                                                | 1.57                    | 152                                | 1.20                                     | 25.4                                                |
| $x=0.195$                                                                                                 | 1.60                    | 160                                | 0.733                                    | 20.0                                                |
| $x=0.39$                                                                                                  | 2.19                    | 159                                | 1.24                                     | 23.1                                                |
| $x=0.78$                                                                                                  | 2.75                    | 175                                | 1.27                                     | 15.1                                                |
